# Supplementary material for: High sensitivity and wide sensing range of stretchable sensors with conductive microsphere array structures
Source: Royal Society of Chemistry journal article supplement (doi:10.1039/c9tc02698c), 2019-01-01
Supplement: c9tc02698c1.pdf [file c9tc02698c1.pdf]

## Supporting Information

Highly sensitive and wide sensing range of stretchable sensors  
with structure of conductive microsphere array embedded in the  
surface of the substrate

Yan Zheng[†], Qi Jin[†], Wanyi Chen, Yi Shun and Zhaoqun Wang\*

*Department of Polymer Science and Engineering, Key Laboratory of High Performance Polymer Material and Technology of Ministry of Education, School of Chemistry and Chemical Engineering, Nanjing University, Nanjing, Jiangsu 210093 (P. R. China)*

*E-mail: zqwang@nju.edu.cn*

[†] These authors contributed equally to this work

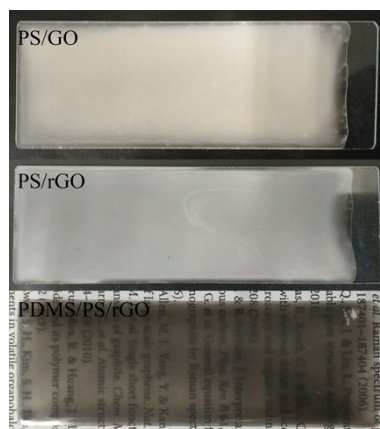

**Figure S1.** Optical images at different stages of the PDMS/PS/rGO sensor preparation process.

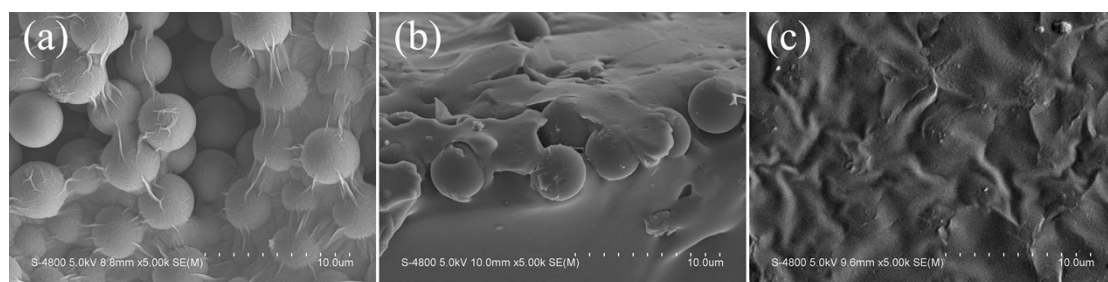

**Figure S2.** SEM image of a PS/GO dispersion prepared using 4 μm particle size PS particles (a), GO/PS is 10 wt%; cross section (b) and surface (c) SEM image of the corresponding sample.

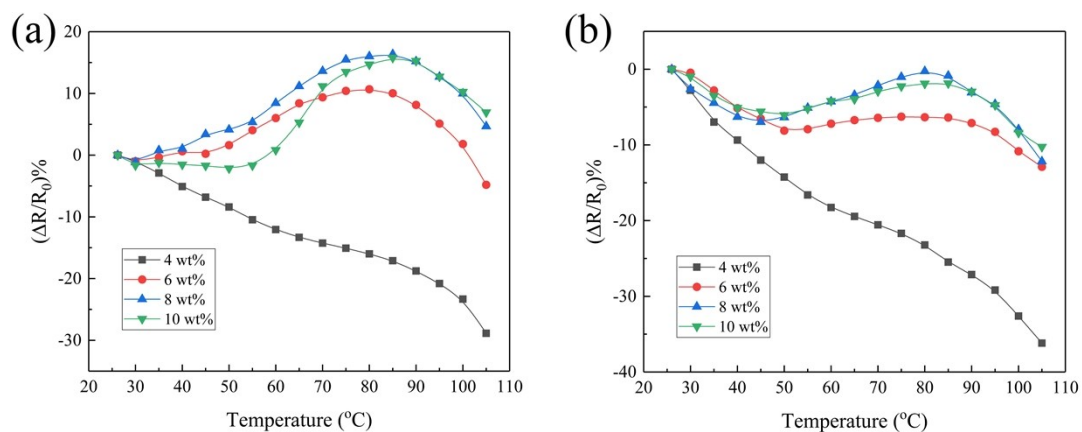

**Figure S3.** The resistance of a sensor prepared from 2  $\mu\text{m}$  (a) and 4  $\mu\text{m}$  (b) PS particles varies with temperature.

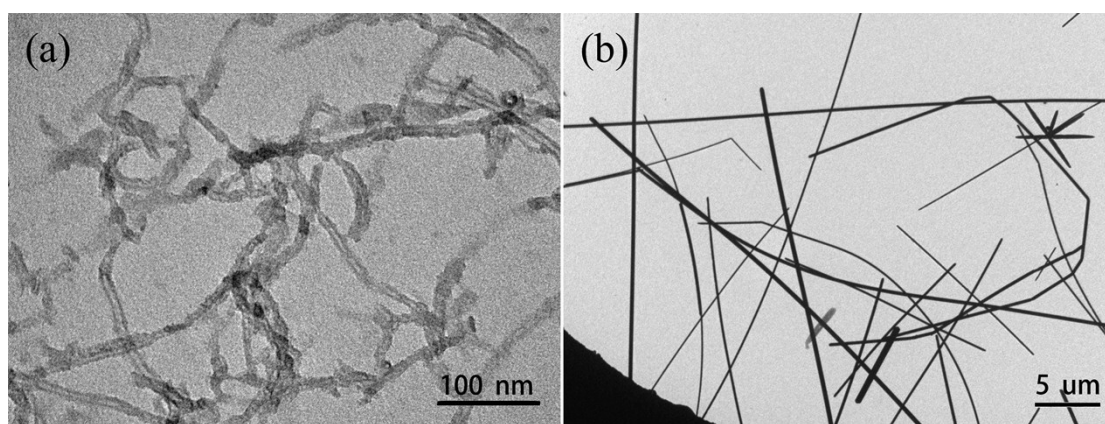

**Figure S4.** TEM images of O-MWCNTs and AgNWs.

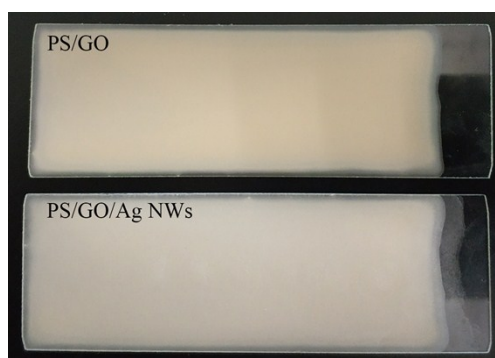

**Figure S5.** Optical picture before and after application of AgNWs.

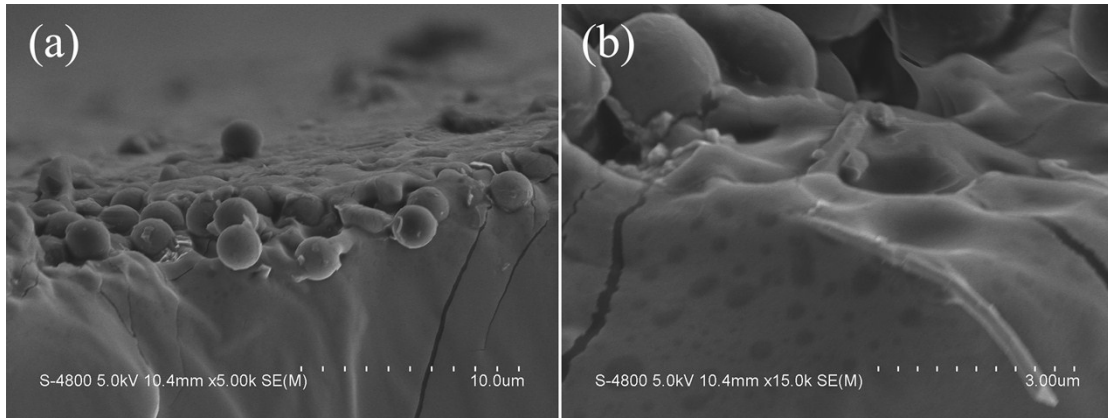

**Figure S6.** Cross-sectional SEM image of the PDMS/PS/rGO/AgNW sensor.
